# Supplementary material for: Photoexcitation dynamics of bromodiphenyl ethers in acetonitrile-d3 studied by femtosecond time-resolved infrared spectroscopy
Source: Royal Society of Chemistry journal article supplement (doi:10.1039/d2cp00063f), 2022-01-01
Supplement: d2cp00063f1.pdf [file d2cp00063f1.pdf]

## Supplementary Information

Photoexcitation Dynamics of Bromodiphenyl Ethers in Acetonitrile- $d_3$  by  
Femtosecond Time-Resolved Infrared Spectroscopy

Jisik Jung<sup>‡</sup>, Juhyang Shin<sup>‡</sup>, Alina Dzhaparova, Jin Kyoong Park, and Manho Lim<sup>\*</sup>

Department of Chemistry and Chemistry Institute for Functional Materials, Pusan National  
University, Busan 46241, Korea

## Synthesis of 3-DDE and 4-DDE

Procedures for deuterium substitution from previous work were followed.<sup>1</sup>

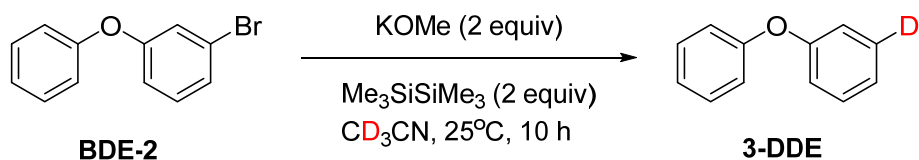

To a dry Schlenk tube equipped with a magnetic stirring bar, BDE-2 (516 mg, 2.07 mmol), KOMe (290 mg, 4.14 mmol), Me<sub>3</sub>SiSiMe<sub>3</sub> (848 μL, 4.14 mmol), and CD<sub>3</sub>CN (2.70 ml, 25 equiv) were added under argon. After stirred at 25 °C for 10 h, the mixture was diluted with water (10 mL) and extracted with Et<sub>2</sub>O (10 mL × 3). Then the combined organic layers were washed with brine and dried over anhydrous Na<sub>2</sub>SO<sub>4</sub>. The solvents were removed under reduced pressure and the crude mixture was purified by silica gel chromatography (100% Hexane) to provide 3-DDE (311 mg, 1.82 mmol) as a yellow oil in 88% yield; <sup>1</sup>H NMR (400 MHz, CDCl<sub>3</sub>) δ 7.36–7.31 (m, 3H), 7.10 (dddd, *J* = 7.1, 4.7, 2.3, 1.1 Hz, 2H), 7.02 (ddt, *J* = 6.4, 2.4, 1.4 Hz, 4H). Consistent with previous report.<sup>2</sup> NMR spectrum is shown in the upper panel of Fig. S7.

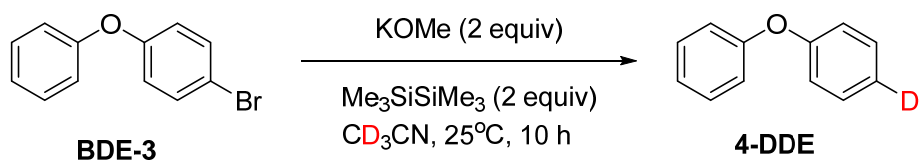

To a dry Schlenk tube equipped with a magnetic stirring bar, BDE-3 (507 mg, 2.04 mmol), KOMe (285 mg, 4.06 mmol), Me<sub>3</sub>SiSiMe<sub>3</sub> (831 μL, 4.06 mmol), and CD<sub>3</sub>CN (2.66 ml, 25 equiv) were added under argon. After stirred at 25 °C for 10 h, the mixture was diluted with water (10 mL) and extracted with Et<sub>2</sub>O (10 mL × 3). Then the combined organic layers were washed with brine and dried over anhydrous Na<sub>2</sub>SO<sub>4</sub>. The solvents were removed under reduced pressure and the crude mixture was purified by silica gel chromatography (100% Hexane) to provide 4-DDE (329 mg, 1.92 mmol) as a yellow oil in 94% yield; <sup>1</sup>H NMR (400 MHz, CDCl<sub>3</sub>) δ 7.31–7.37 (m, 3H), 7.08–7.13 (m, 1H), 6.99–7.04 (m, 4H). Consistent with previous report.<sup>3</sup> NMR spectrum is shown in the lower panel of Fig. S8.

## References

1. X. Wang, M.-H. Zhu, D. P. Schuman, D. Zhong, W.-Y. Wang, L.-Y. Wu, W. Liu, B. M. Stoltz and W.-B. Liu, *J. Am. Chem. Soc.*, 2018, **140**, 10970-10974.
2. I. O. Shapiro, Y. I. Ranneva and A. I. Shatenshtein, *Zhurnal Obshchei Khimii*, 1979, **49**, 2030.
3. S. Vanderheiden, B. Bulat, T. Zevaco, N. Jung and S. Bräse, *ChemComm*, 2011, **47**, 9063-9065.

| Substances        | Experiment                      |                                                               |                          | Calculation                     |                              |
|-------------------|---------------------------------|---------------------------------------------------------------|--------------------------|---------------------------------|------------------------------|
|                   | $\bar{\nu}$ (cm <sup>-1</sup> ) | $\epsilon$ ( $\times 10^3$ M <sup>-1</sup> cm <sup>-2</sup> ) | FWHM (cm <sup>-1</sup> ) | $\bar{\nu}$ (cm <sup>-1</sup> ) | Int. (km mol <sup>-1</sup> ) |
| BDE-2             | 1592                            | 1.8                                                           | 11.3                     | 1638                            | 5                            |
|                   | 1582                            | 5.4                                                           | 6.6                      | 1632                            | 18                           |
|                   | 1578                            | 3.5                                                           | 9.4                      | 1618                            | 273                          |
|                   | 1570                            | 0.8                                                           | 16.5                     | 1609                            | 111                          |
|                   | 1491                            | 2.8                                                           | 4.6                      |                                 |                              |
|                   | 1489                            | 1.4                                                           | 10.7                     | 1524                            | 109                          |
|                   | 1470                            | 8.7                                                           | 6.4                      | 1501                            | 295                          |
|                   | 1458                            | 0.2                                                           | 3.9                      | 1489                            | 4                            |
| 3-DDE             | 1590                            | 0.7                                                           | 6.9                      | 1641                            | 6                            |
|                   | 1589                            | 1.6                                                           | 29.8                     | 1630                            | 26                           |
|                   | 1582                            | 4.4                                                           | 8.4                      | 1624                            | 126                          |
|                   | 1566                            | 0.2                                                           | 5.9                      | 1619                            | 75                           |
|                   | 1542                            | 0.1                                                           | 12.7                     | –                               | –                            |
|                   | 1492                            | 1.0                                                           | 4.4                      |                                 |                              |
|                   | 1490                            | 3.2                                                           | 12.0                     | 1523                            | 124                          |
|                   | 1472                            | 6.3                                                           | 5.6                      | 1504                            | 194                          |
| 1457              | 0.3                             | 7.5                                                           | 1490                     | 3                               |                              |
| 3-CDE             | 1593                            | 2.4                                                           | 16.8                     | 1645                            | 13                           |
|                   |                                 |                                                               |                          | 1632                            | 13                           |
|                   |                                 |                                                               |                          | 1630                            | 48                           |
|                   | 1581                            | 5.1                                                           | 11.8                     | 1610                            | 181                          |
|                   | 1571                            | 0.6                                                           | 7.8                      |                                 |                              |
|                   | 1491                            | 2.3                                                           | 4.4                      | 1524                            | 94                           |
| 1483              | 6.4                             | 10.7                                                          | 1516                     | 121                             |                              |
| 1457              | 0.2                             | 4.2                                                           | 1488                     | 5                               |                              |
| BDE-2 (R)         | 1588 <sup>a</sup>               | 7.1                                                           | 13.7 <sup>a</sup>        | 1637                            | 19                           |
|                   |                                 |                                                               |                          | 1631                            | 28                           |
|                   |                                 |                                                               |                          | 1622                            | 160                          |
|                   | 1531 <sup>a</sup>               | 0.9                                                           | 9.8 <sup>a</sup>         | 1565                            | 34                           |
|                   | 1490 <sup>a</sup>               | 4.2                                                           | 6.1 <sup>a</sup>         | 1523                            | 130                          |
| 1444 <sup>a</sup> | 10.3                            | 4.2 <sup>a</sup>                                              | 1489                     | 4                               |                              |
|                   |                                 |                                                               | 1476                     | 287                             |                              |
| BDE-2 (RS)        | 1579                            | 2.1                                                           | 8.6                      | 1643                            | 4                            |
|                   |                                 |                                                               |                          | 1631                            | 18                           |
|                   |                                 |                                                               |                          | 1629                            | 73                           |
|                   | 1570                            | 5.4                                                           | 13.1                     | 1612                            | 190                          |
|                   | 1491                            | 1.8                                                           | 13.9                     | 1524                            | 107                          |
| 1470              | 4.8                             | 19.0                                                          | 1517                     | 114                             |                              |
|                   |                                 |                                                               | 1489                     | 7                               |                              |
| BDE-2 (IM)        | 1564                            | 13.2                                                          | 35.3                     | –                               | –                            |
|                   | 1480                            | 2.7                                                           | 17.5                     | –                               | –                            |

Table S1 Fitted spectral parameters, vibration frequencies ( $\bar{\nu}$ ), integrated extinction coefficients ( $\epsilon$ ) and full width at half maximum (FWHM) of substances and intermediates appeared during BDE-2's photodissociation from 1635 to 1435 cm<sup>-1</sup>, with the calculated results using density functional theory (DFT) methods with B3LYP/cc-pVTZ. Information of BDE-2, 3-DDE, and 3-CDE was obtained from the equilibrium infrared (IR) spectra at 293 K. The others were obtained for fitting time-resolved IR (TRIR) spectra.

<sup>a</sup> The values were given for spectra after thermalization.

| Substances              | Experiment                      |                                                               |                          | Calculation                     |                              |
|-------------------------|---------------------------------|---------------------------------------------------------------|--------------------------|---------------------------------|------------------------------|
|                         | $\bar{\nu}$ (cm <sup>-1</sup> ) | $\epsilon$ ( $\times 10^3$ M <sup>-1</sup> cm <sup>-2</sup> ) | FWHM (cm <sup>-1</sup> ) | $\bar{\nu}$ (cm <sup>-1</sup> ) | Int. (km mol <sup>-1</sup> ) |
| BDE-3                   | 1601                            | 0.7                                                           | 8.8                      | 1639                            | 16                           |
|                         | 1592                            | 0.3                                                           | 6.5                      | 1631                            | 16                           |
|                         | 1581                            | 2.7                                                           | 9.9                      | 1619                            | 79                           |
|                         | 1578                            | 0.5                                                           | 4.5                      | 1614                            | 26                           |
|                         | 1494                            | 0.8                                                           | 4.9                      | 1525                            | 54                           |
|                         | 1484                            | 14.2                                                          | 6.7                      | 1513                            | 439                          |
|                         | 1457                            | 0.1                                                           | 4.3                      | 1489                            | 2                            |
| 4-DDE                   | 1592                            | 0.5                                                           | 9.5                      | 1641                            | 5                            |
|                         | 1587                            | 2.3                                                           | 31.3                     | 1631                            | 23                           |
|                         | 1584                            | 2.3                                                           | 9.5                      | 1623                            | 168                          |
|                         | 1581                            | 0.9                                                           | 4.6                      | 1619                            | 26                           |
|                         | 1547                            | 0.3                                                           | 13.5                     | –                               | –                            |
|                         | 1493                            | 0.9                                                           | 5.6                      | 1524                            | 60                           |
|                         | 1486                            | 7.2                                                           | 8.7                      | 1515                            | 291                          |
|                         | 1479                            | 3.6                                                           | 10.1                     | –                               | –                            |
| 4-CDE                   | 1609                            | 1.4                                                           | 8.1                      | 1646                            | 128                          |
|                         | 1597                            | 0.4                                                           | 9.2                      | 1634                            | 11                           |
|                         | 1589                            | 4.9                                                           | 6.5                      | 1627                            | 189                          |
|                         | 1580                            | 0.4                                                           | 8.3                      | 1602                            | 17                           |
|                         | 1505                            | 2.6                                                           | 6.9                      | 1535                            | 121                          |
|                         | 1495                            | 5.2                                                           | 16.1                     | 1521                            | 282                          |
|                         | 1486                            | 5.6                                                           | 7.1                      | –                               | –                            |
|                         | 1457                            | 0.1                                                           | 3.5                      | 1488                            | 3                            |
| BDE-3 (S <sub>1</sub> ) | 1582                            | 1.4                                                           | 29.4                     | 1608                            | 95                           |
|                         | 1501                            | 4.1                                                           | 23.3                     | 1538                            | 837                          |
|                         | 1486                            | 8.3                                                           | 11.1                     | 1537                            | 2670                         |
| BDE-3 (R)               | 1593 <sup>a</sup>               | 1.0                                                           | 6.9 <sup>a</sup>         | 1638                            | 59                           |
|                         | 1541 <sup>a</sup>               | 5.7                                                           | 13.9 <sup>a</sup>        | 1628                            | 43                           |
|                         | 1489 <sup>a</sup>               | 8.6                                                           | 6.9 <sup>a</sup>         | 1622                            | 6                            |
|                         | 1443 <sup>a</sup>               | 4.6                                                           | 7.2 <sup>a</sup>         | 1580                            | 94                           |
|                         | –                               | –                                                             | –                        | 1521                            | 202                          |
|                         | –                               | –                                                             | –                        | 1491                            | 1                            |
| BDE-3 (RS)              | 1590                            | 4.4                                                           | 17.2                     | 1480                            | 89                           |
|                         | –                               | –                                                             | –                        | 1642                            | 67                           |
|                         | –                               | –                                                             | –                        | 1632                            | 11                           |
|                         | 1570                            | 1.4                                                           | 12.2                     | 1626                            | 185                          |
|                         | 1491                            | 2.6                                                           | 12.2                     | 1607                            | 84                           |
| BDE-3 (IM)              | 1476                            | 6.0                                                           | 24.0                     | 1537                            | 105                          |
|                         | 1578                            | 1.4                                                           | 9.0                      | 1522                            | 256                          |
| –                       | –                               | –                                                             | –                        | –                               |                              |
| –                       | 10.8                            | 20.0                                                          | –                        | –                               |                              |

Table S2 Fitted spectra parameters, vibration frequencies ( $\bar{\nu}$ ), integrated extinction coefficients ( $\epsilon$ ) and full width at half maximum (FWHM) of substances and intermediates appeared during BDE-3's photodissociation from 1635 to 1435 cm<sup>-1</sup>, and calculation results using DFT calculations with B3LYP/cc-pVTZ. Information of BDE-3, 4-DDE, 4-CDE was obtained from the equilibrium infrared IR spectra at 293 K. The others were obtained from the fitting the TRIR spectra.

<sup>a</sup>The values were given for spectra after thermalization.

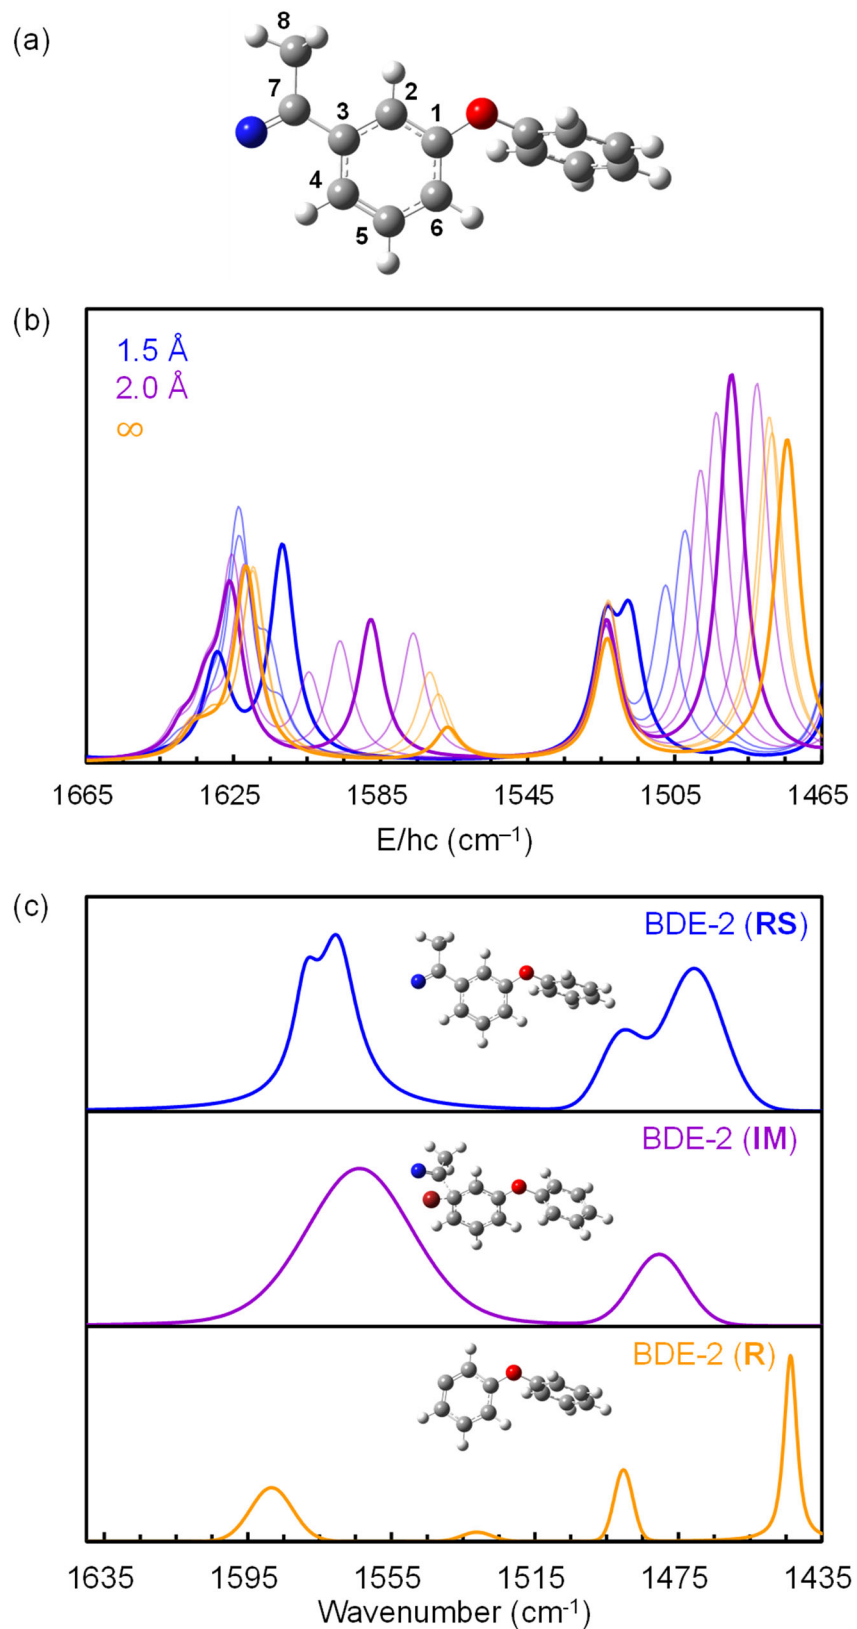

Fig. S1 (a) Optimized molecular structure of the BDE-2 (**RS**) by the DFT calculation. (b) Spectra calculated as  $\text{CD}_3\text{CN}$  approaches the BDE-2 (**R**) to the optimized distance of 1.5 Å, i.e., the distance of the  $\text{C}_3\text{-C}_7$  bond of the BDE-2 (**RS**) changes from  $\infty$  (thick orange line) to 1.5 (thick blue line) Å. Calculated spectra with FWHM of  $8\text{ cm}^{-1}$  when the distance of the  $\text{C}_3\text{-C}_7$  bond is 2 Å (thick purple line) has characteristics of the spectrum of BDE-2 (**IM**). (c) Basis spectra of **R**, **IM**, and **RS** of BDE-2 with their optimized molecular structures.

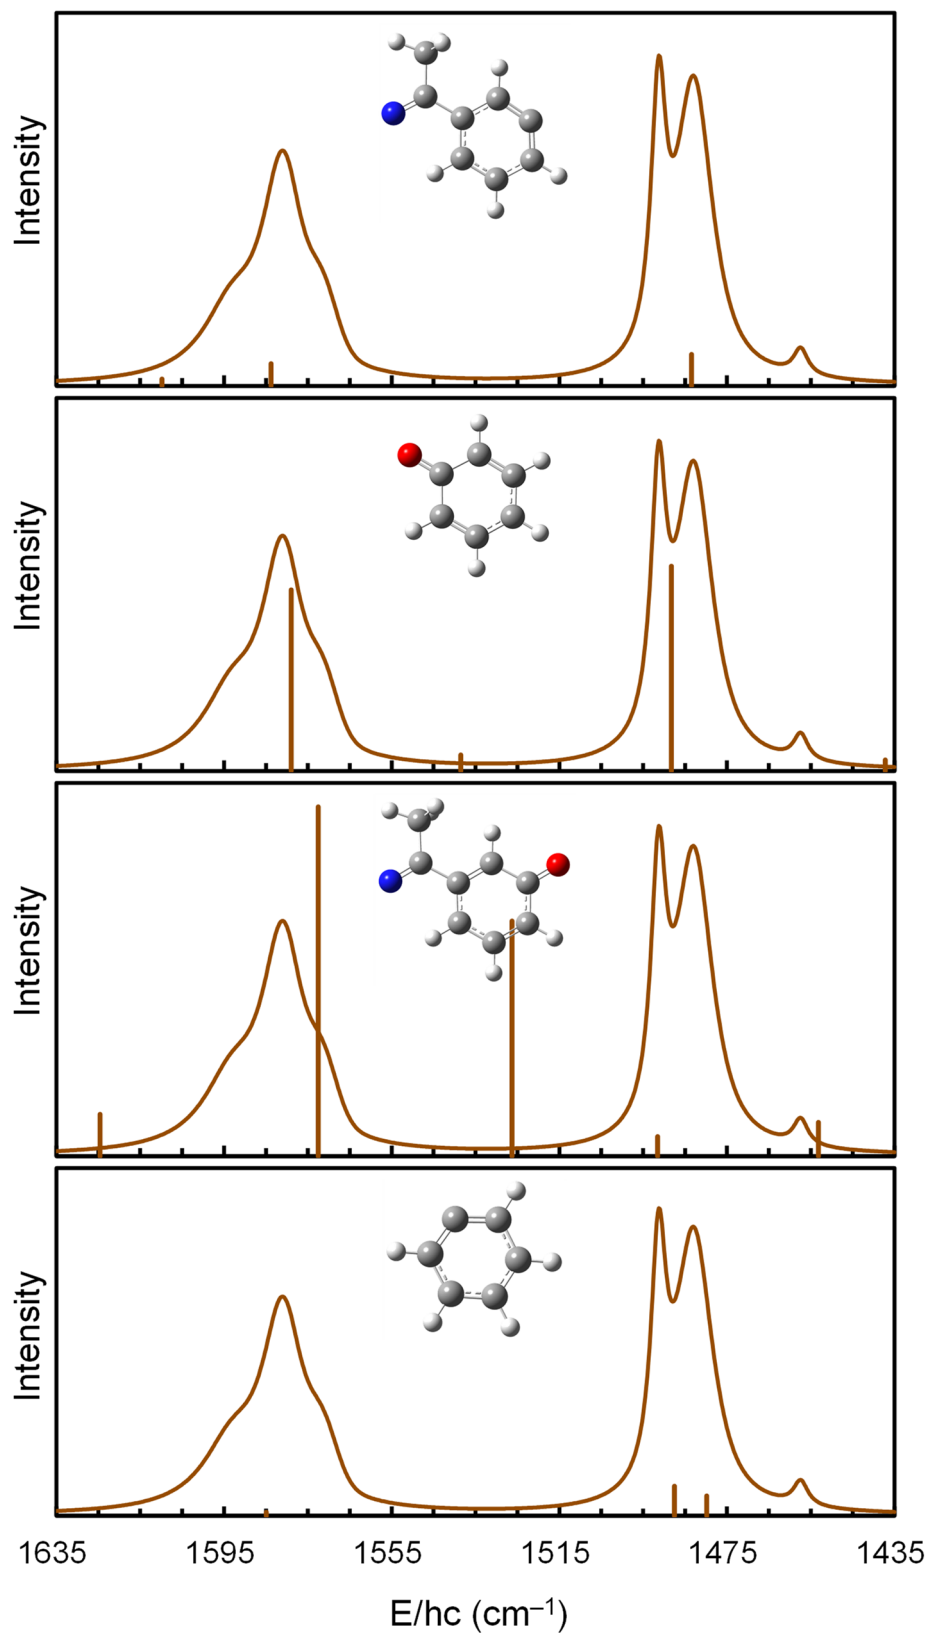

Fig. S2 Calculated spectra (sticks) and optimized molecular structures of anticipated fragments produced upon dissociation of the C-O bond of BDE-2 by the DFT methods (B3LYP/cc-pVTZ) in the basis spectrum of BDE-2 (X).

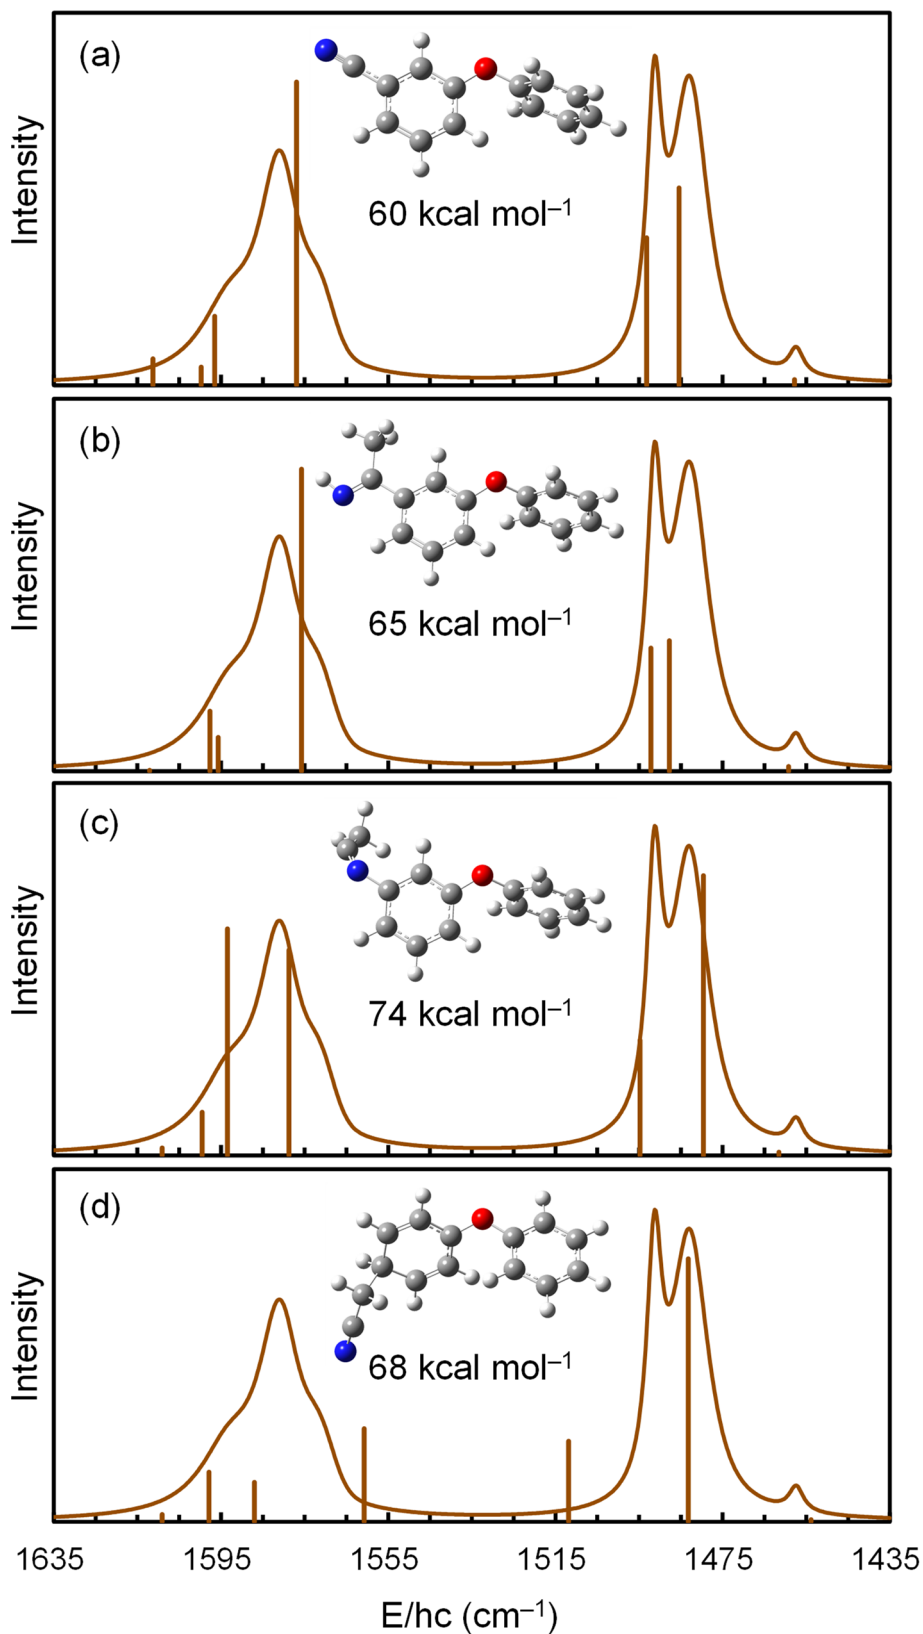

Fig. S3 Calculated spectra (sticks) and optimized molecular structures of various candidates for BDE-2 (**X**) by the DFT methods (B3LYP/cc-pVTZ). (a) 3-CDE. (b) D attached to N of BDE-2 (**RS**). (c) BDE-2 (**RS**) attached with N of  $\text{CD}_3\text{CN}$ . (d) BDE-2 (**RS**) with C of  $\text{CD}_3$  attached. The calculated frequencies were scaled using scale factors of 0.975–0.981 to best match with the observed bands. The energy values are calculated relative Gibbs free energies for the corresponding compounds from BDE-2 in the ground state.

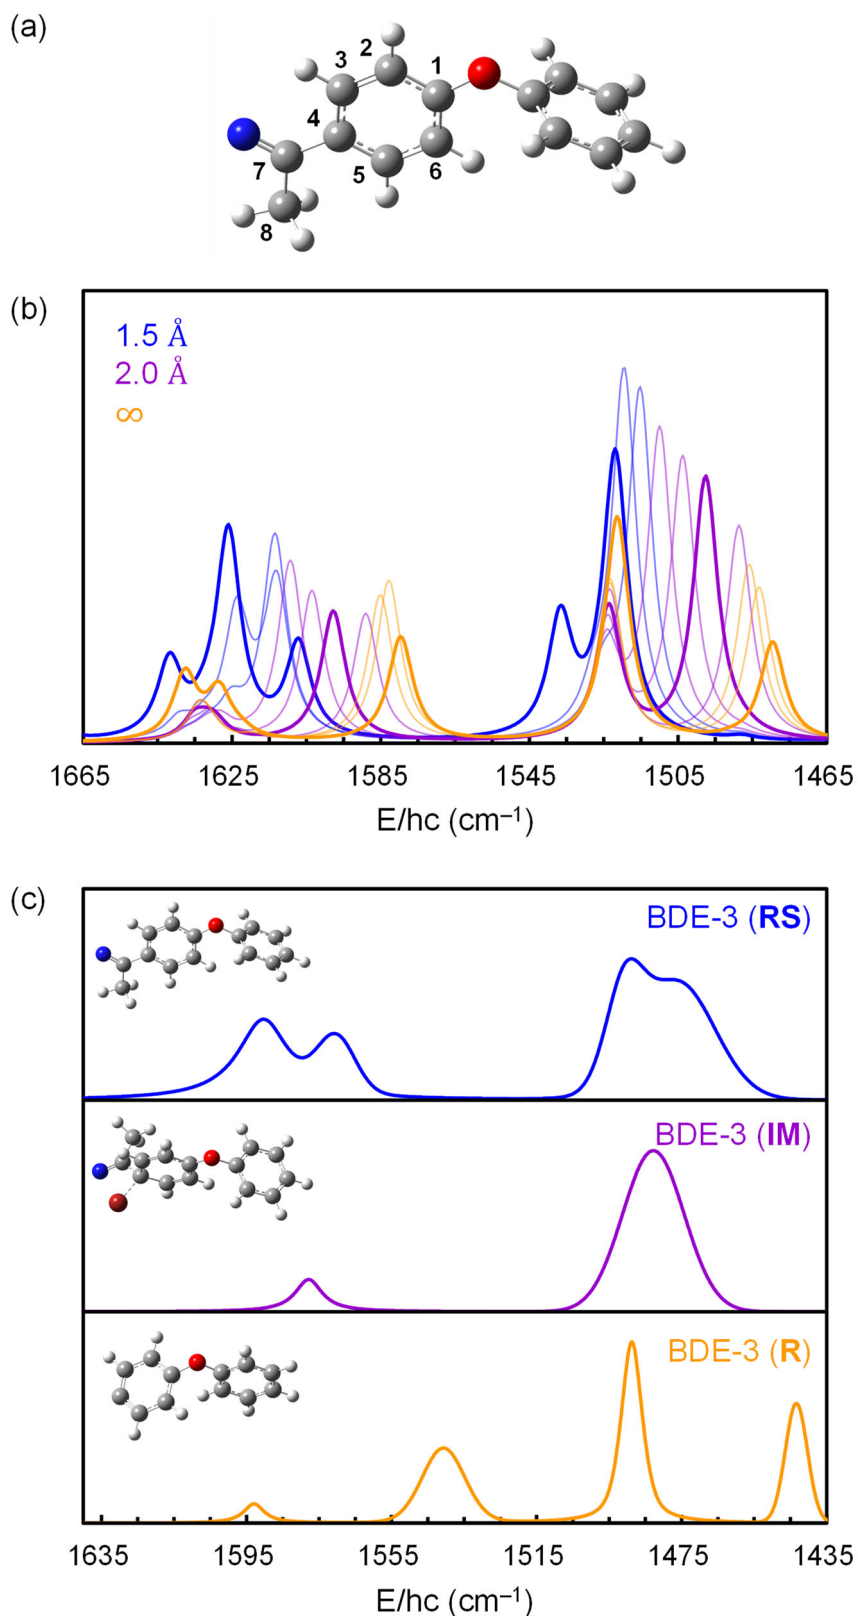

Fig. S4 (a) Optimized molecular structure of the BDE-3 (**RS**) by the DFT calculation (B3LYP/cc-pVTZ). (b) Spectra calculated as CD<sub>3</sub>CN approaches the BDE-3 (**R**) to the optimized distance of 1.5 Å, i.e., the distance of the C<sub>4</sub>–C<sub>7</sub> bond of the BDE-3 (**RS**) changes from ∞ (thick orange line) to 1.5 (thick blue line) Å. Calculated spectra with FWHM of 8 cm<sup>-1</sup> when the distance of the C<sub>4</sub>–C<sub>7</sub> bond is 2 Å (thick purple line) has characteristics of the spectrum of BDE-3 (**IM**). (c) Basis spectra of **R**, **IM**, and **RS** of BDE-3 with their optimized molecular structures.



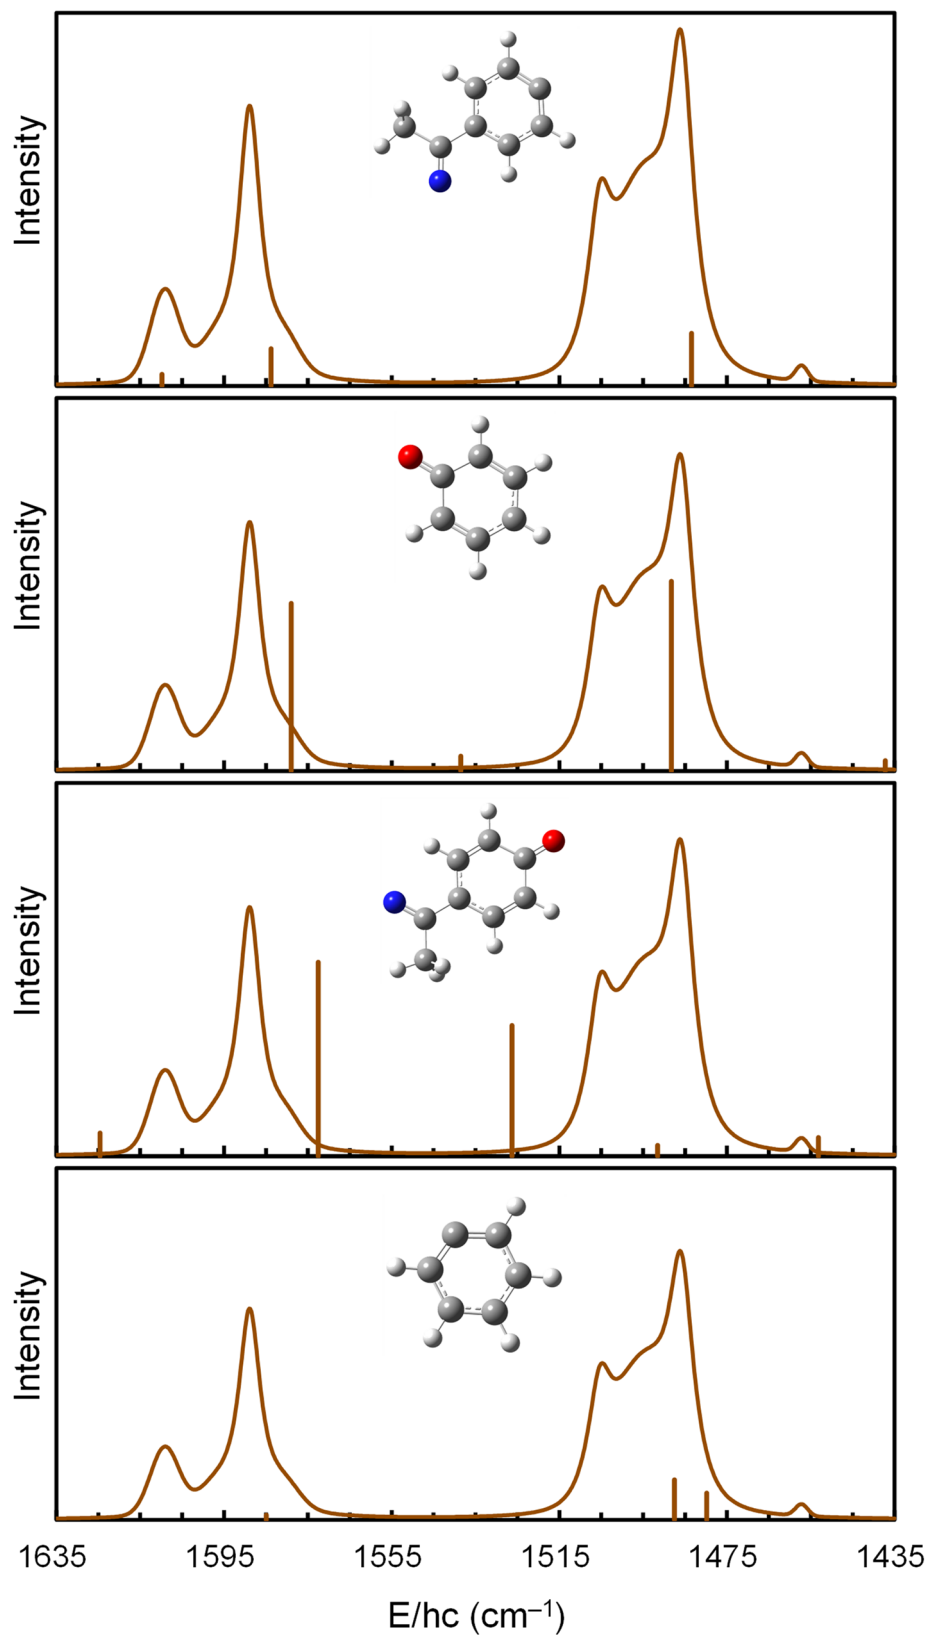

Fig. S5 Calculated spectra (sticks) and optimized molecular structures of anticipated fragments produced upon dissociation of the C–O bond of BDE-3 by the DFT methods (B3LYP/cc-pVTZ) in the basis spectrum of BDE-3 (X).

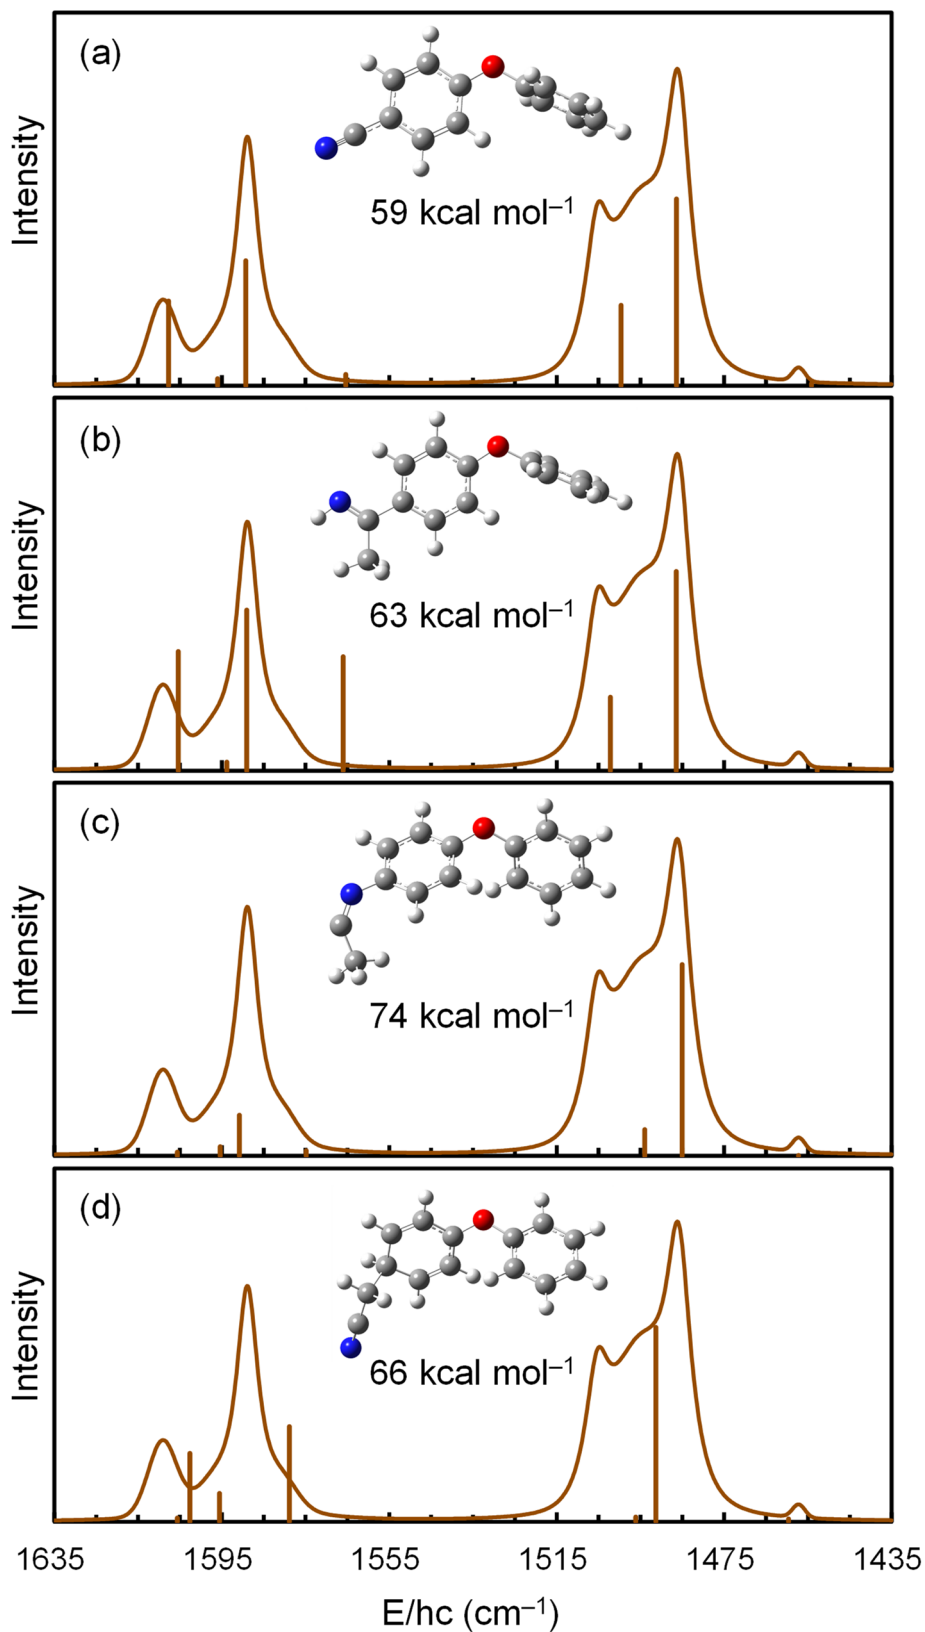

Fig. S6 Calculated spectra (sticks) and optimized molecular structures of various candidates for BDE-3 (X) by the DFT methods (B3LYP/cc-pVTZ). (a) 4-CDE. (b) D attached to N of BDE-3 (RS). (c) BDE-3 (RS) attached with N of  $\text{CD}_3\text{CN}$ . (d) BDE-3 (RS) with C of  $\text{CD}_3$  attached. The calculated frequencies were scaled using scale factors of 0.977–0.980 to best match with the observed bands. The energy values are calculated relative Gibbs free energies for the corresponding compounds from BDE-3 in the ground state.

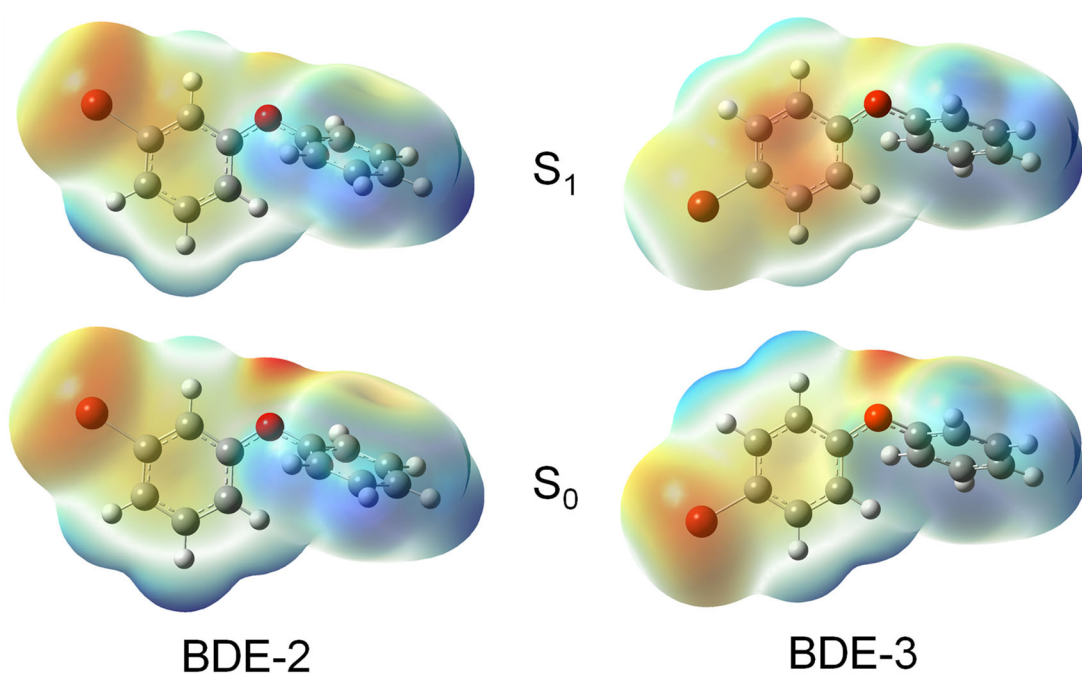

Fig. S7 Charge density maps of the  $S_0$  and  $S_1$  states of BDE-2 and BDE-3.

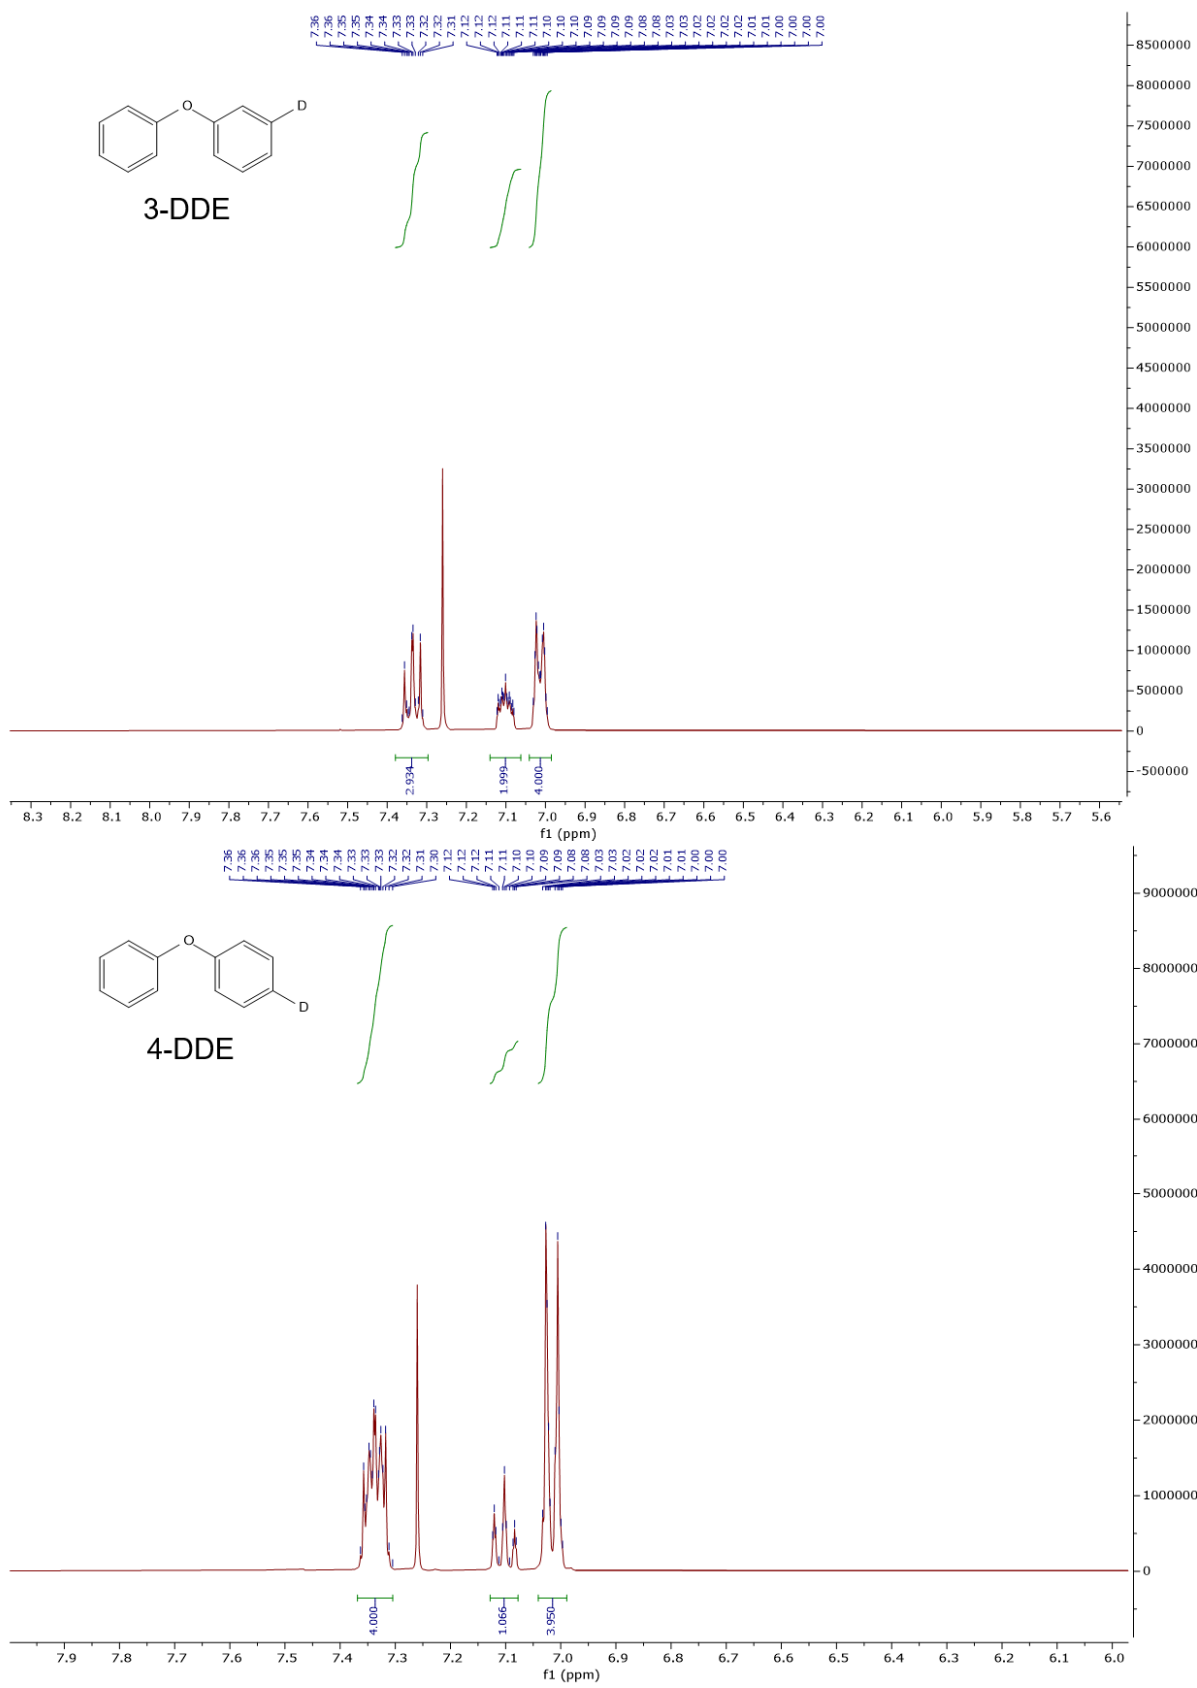

Fig. S8  $^1\text{H}$  NMR (400 MHz,  $\text{CDCl}_3$ ) of 3-DDE and 4-DDE.
